# Supplementary material for: Effect of the Deposition Time on the Structural, 3D Vertical Growth, and Electrical Conductivity Properties of Electrodeposited Anatase–Rutile Nanostructured Thin Films
Source: MDPI journal article supplement (doi:10.3390/mi13081361), 2022-08-21
Supplement: s1 [file s1]

## Article

# Structural, vertical growth, and electrical conductivity properties of time-dependent electrodeposited Anatase-Rutile nanostructured thin films

Structural, 3D morphological, and electrical conductivity properties of electrodeposited TiO<sub>2</sub> thin films.

**Table S1.** Calculated Rietveld refinement results for XRD measurements performed on electrodeposited TiO<sub>2</sub> thin films.

| Parameters                    | Electrodeposition time |            |            |            |            |
|-------------------------------|------------------------|------------|------------|------------|------------|
|                               | 2s                     | 4s         | 6s         | 8s         | 10s        |
| Crystal system                | Tetragonal             | Tetragonal | Tetragonal | Tetragonal | Tetragonal |
| Space group                   | I 41/a m d             | I 41/a m d | I 41/a m d | I 41/a m d | I 41/a m d |
| a (Å)                         | 3.79                   | 3.77       | 3.71       | 3.79       | 3.79       |
| c (Å)                         | 9.52                   | 9.45       | 9.54       | 9.53       | 9.53       |
| Phase (%)                     | 78.20                  | 75.70      | 76.20      | 79.8       | 82.10      |
| Crystallite size Anatase (nm) | 13.07                  | 12.97      | 12.55      | 14.39      | 15.09      |
| Crystal system                | Tetragonal             | Tetragonal | Tetragonal | Tetragonal | Tetragonal |
| Space group                   | P 42/m a m             | P 42/m a m | P 42/m a m | P 42/m a m | P 42/m a m |
| a (Å)                         | 4.59                   | 4,566      | 4.59       | 4,594      | 4,593      |
| c (Å)                         | 2.96                   | 3,052      | 2.96       | 2,962      | 2,961      |
| Phase (%)                     | 8.50                   | 7.40       | 16.00      | 13,0       | 11,9       |
| Crystallite size Rutile (nm)  | 11,32                  | 12,82      | 12,44      | 12,08      | 10,19      |
| Crystal system                | Cubic                  | Cubic      | Cubic      | Cubic      | Cubic      |
| Space group                   | I a -3                 | I a -3     | I a -3     | I a -3     | I a -3     |
| a (Å)                         | 10.22                  | 10,19      | 10.22      | 10.22      | 10.22      |
| Phase (%)                     | 13.30                  | 17.00      | 7.80       | 6.20       | 6.10       |
| R <sub>exp</sub>              | 7.50                   | 8.30       | 9.60       | 8.70       | 7.20       |
| R <sub>wp</sub>               | 12.30                  | 11.7       | 13.50      | 15.20      | 10.30      |
